# Supplementary material for: Cryo EM structure of intact rotary H+-ATPase/synthase from Thermus thermophilus
Source: PubMed Central journal article supplement (PMC5758568; doi:10.1038/s41467-017-02553-6), 2018-01-08
Supplement: 41467_2017_2553_MOESM1_ESM.pdf [file 41467_2017_2553_MOESM1_ESM.pdf]

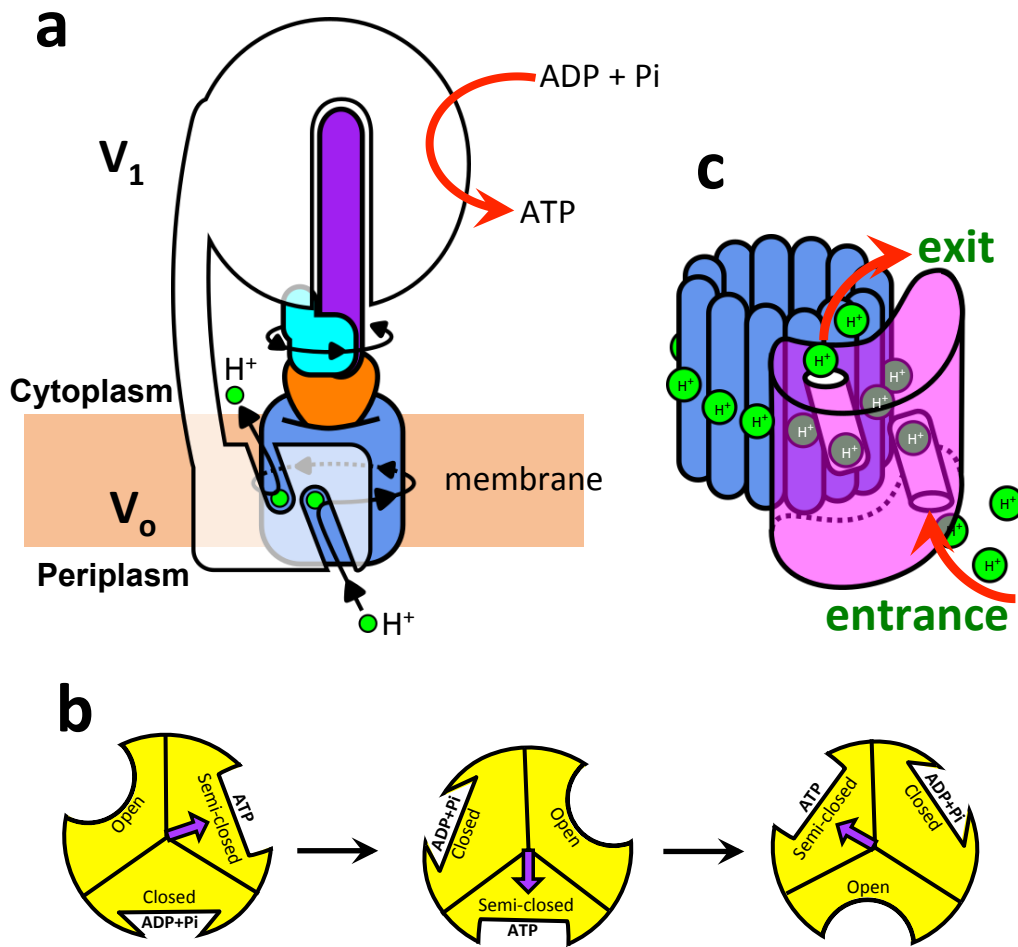

1  
2 **Supplementary figure 1. Schematic model for rotary ATPase and the mechanism.**  
3 **a.** Structure of rotary ATPase. The rotary ATPase is a reversible molecular motor. The ATPase catalyzes  
4 proton translocation across the membrane when ATP hydrolysis in  $A_3B_3$  rotates the central rotor complex.  
5 The surrounding stator apparatus (white) synthesizes ATP from ADP and inorganic phosphate by rotation  
6 of the central rotor (colored) driven by the electrochemical potential across the membrane. **b.** The three  
7 catalytic sites in  $A_3B_3$ . These adopt three different nucleotide binding conformations, open, closed, and  
8 semi-closed. The ATPase domain changes three states of binding site substantially, resulting in rotation of  
9 the central rotor (purple arrow). Unlike  $F_1$ , the  $V_1$  does not show an apparent substep in the ATPase mode.  
10 **c.** Two channel model for  $H^+$ -rotary ATPase. Proton translocation occurs through the periplasmic and  
11 cytoplasmic pores colored in transparent magenta. In the *T. thermophilus* V/A-ATPase, one rotation of the  
12 rotor ring translocates 12 protons.

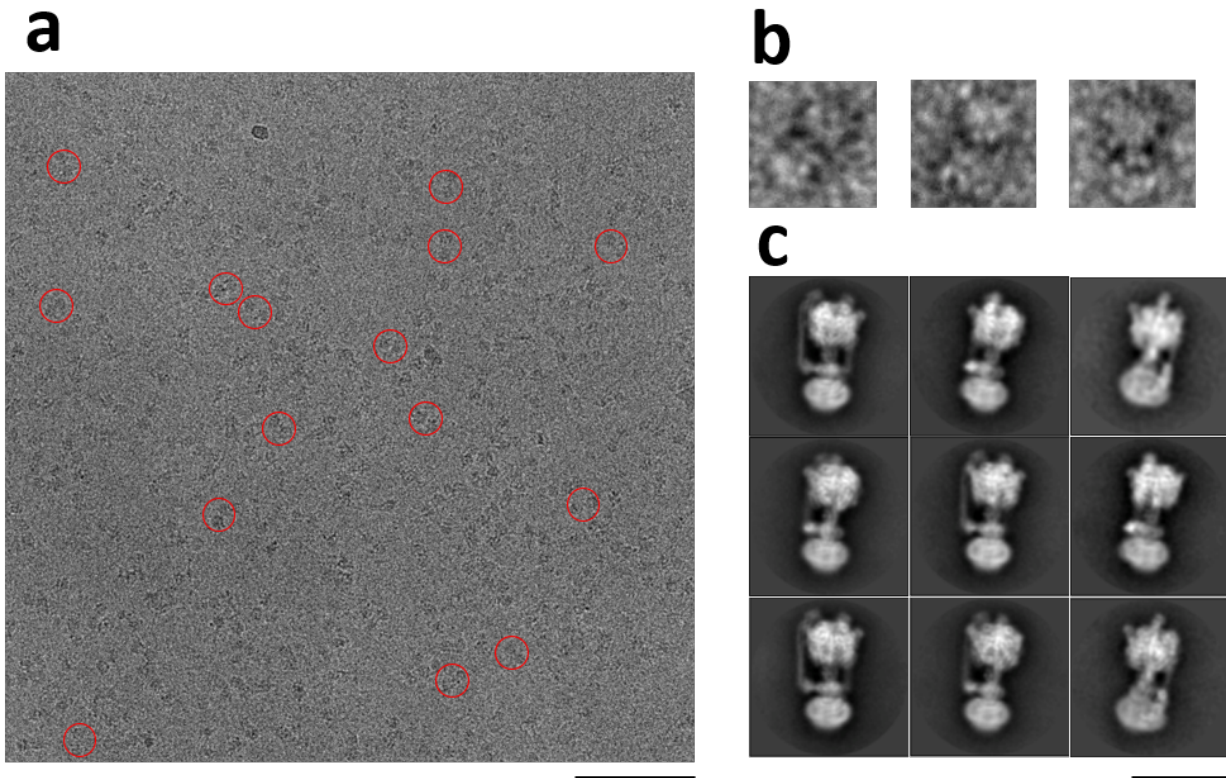

13  
14  
15  
16  
17  
18  
19

**Supplementary figure 2. *Tth* V/A-ATPase particle images.** **a**, Example micrograph with *Tth* V/A-ATPase particles circled in red. Scale bar, 1  $\mu\text{m}$ . **b**, Representative V/A-ATPase single particles obtained from manual picking. **c**, Example of 2D class averaged images from all particles obtained from reference-free classification. Scale bar, 200  $\text{\AA}$ .

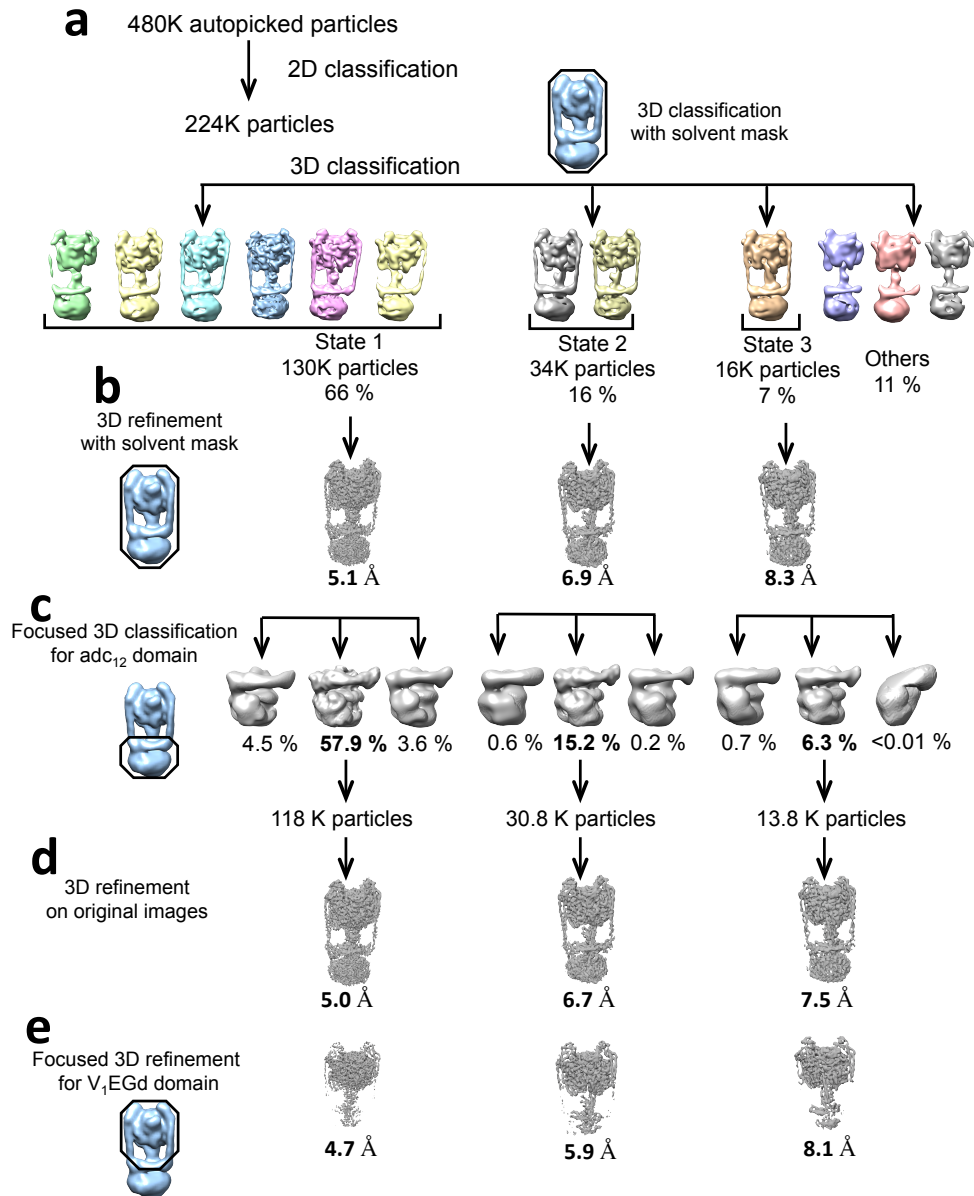

20  
 21  
 22 **Supplementary figure 3. Image processing procedures for V/A-ATPase single particle analysis.** All  
 23 processing steps were analyzed by RELION2.0. Representative micrograph and representative 2D class  
 24 averages from reference-free 2D classification are shown in Supplementary figure 1. **a**, The ~224k  
 25 particles were used for 3D classification into 12 classes by imposing a specific mask cutting into protein  
 26 density. **b**, Resulting classes were further classified by eye based on orientation of the F subunit, and the  
 27 classes with the same orientation were combined. **c-e**, Focused 3D classification and refinement  
 28 approaches for both the whole ATPase (**c**, **d**) and the hydrophilic V<sub>1</sub>EGd (**e**, A<sub>3</sub>B<sub>3</sub>DF(EG<sub>CT</sub>)<sub>2</sub>d)  
 29 subcomplex only gave improved maps for each state. All resolutions are based on the gold-standard  
 30 Fourier shell correlation (FSC) = 0.143 criterion.

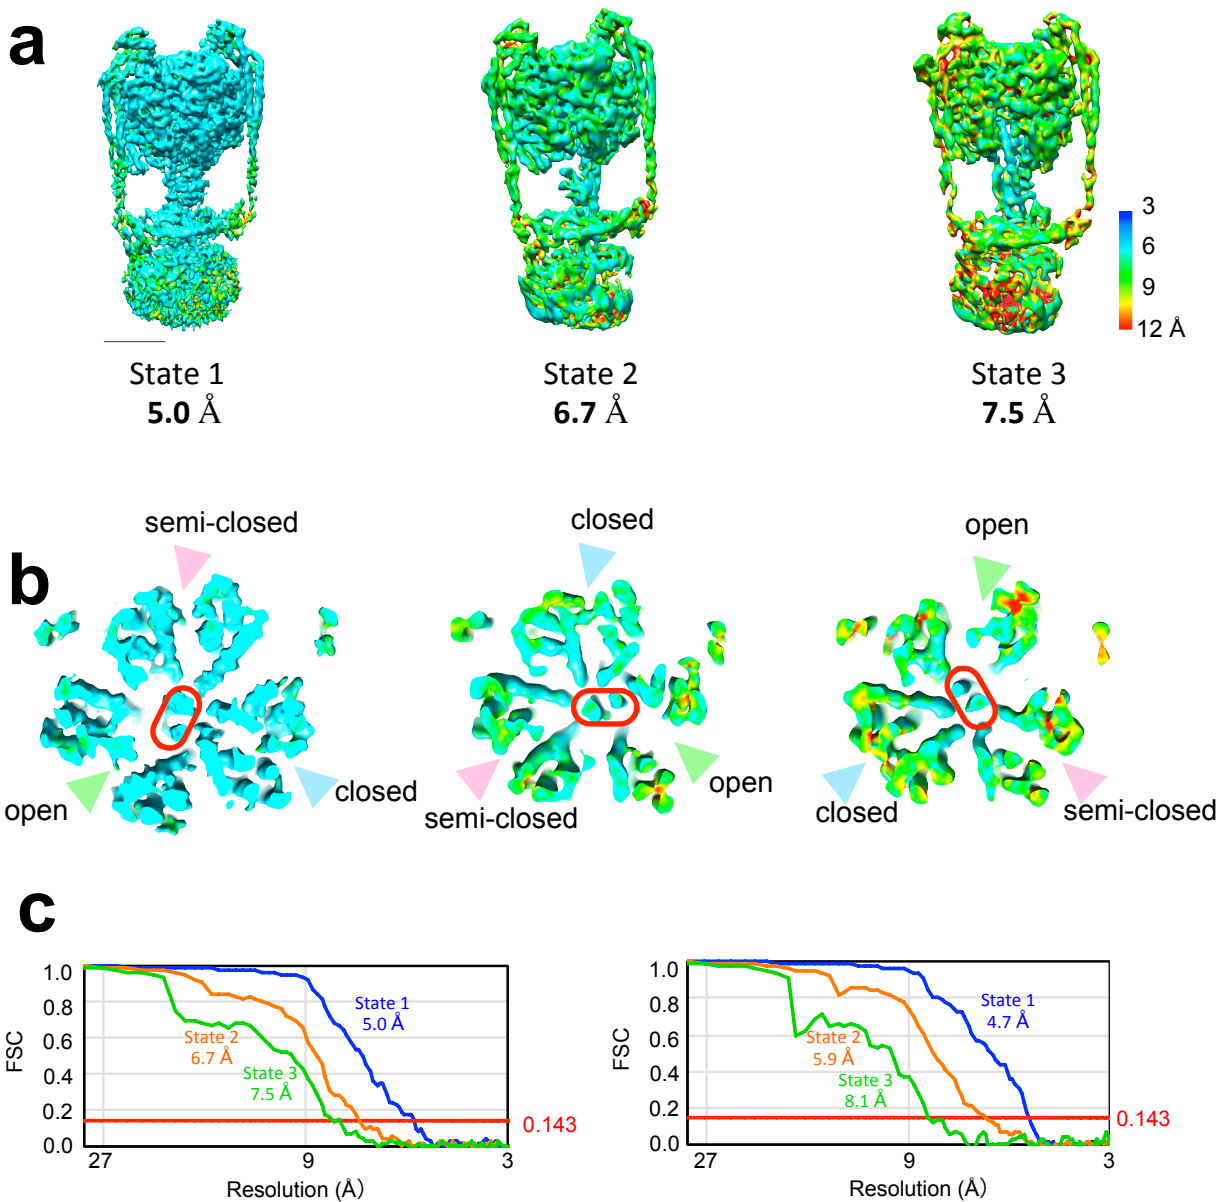

31  
32  
33  
34  
35  
36  
37

**Supplementary figure 4. Local resolution of the three maps.** **a**, Local resolution estimation by Resmap for *Tth* V/A-ATPase maps. Scale bar, 50 Å. Horizontal sections through V<sub>1</sub> are shown in **b**. **c**, Fourier shell correlation (FSC) curve for the three *Tth* V/A-ATPase maps (left) and V<sub>1</sub>EGd (A<sub>3</sub>B<sub>3</sub>DF(EG<sub>CT</sub>)<sub>2</sub>d) maps (right). The overall resolution of the map at FSC = 0.143 is indicated by the red line.



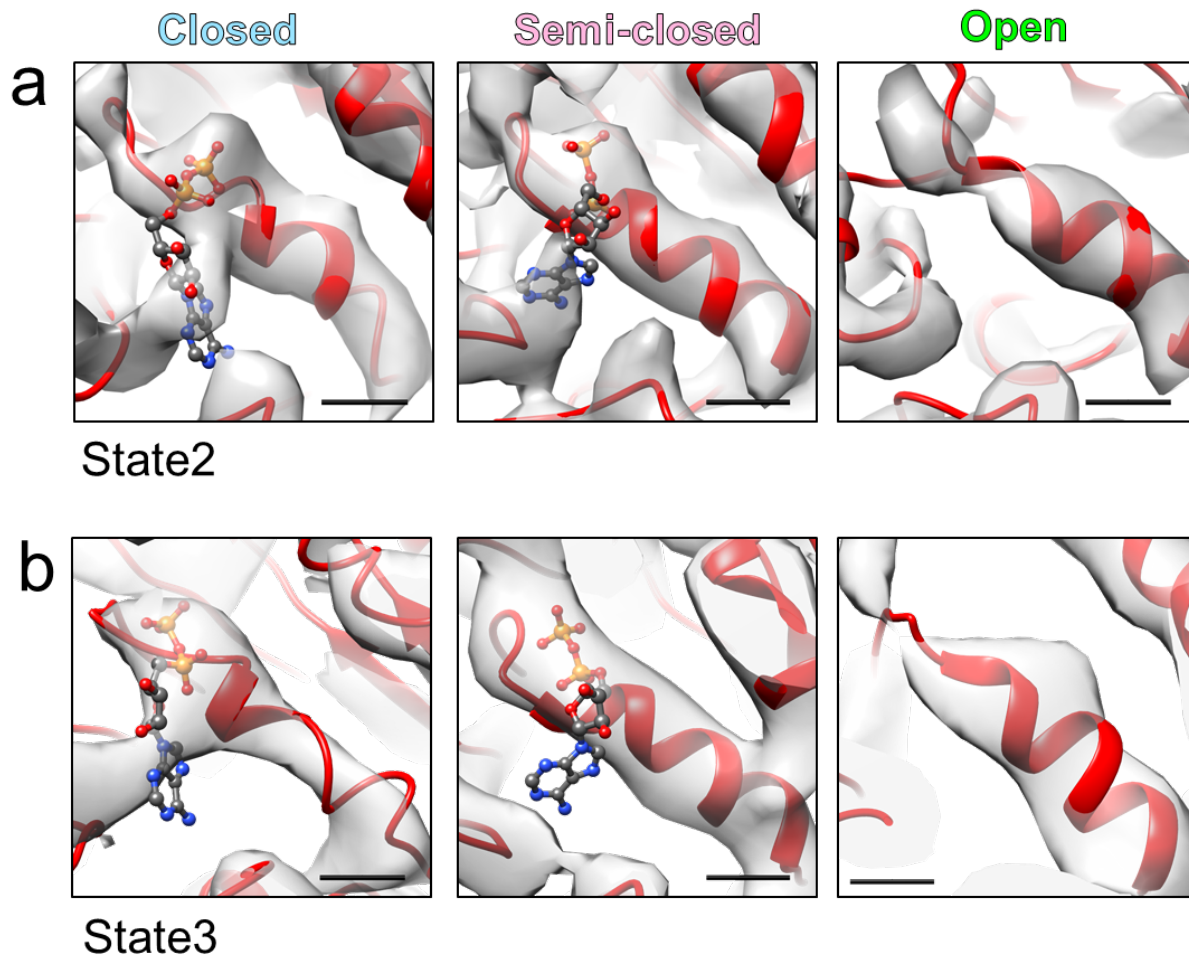

38  
 39 **Supplementary figure 5. Magnified views of the nucleotide-binding sites in the AB pairs in state2 (a)**  
 40 **and 3 (b).** ADP is depicted in and ball-and-sticks format. Experimental maps,  $V_1EGd$  of state2 and  $VoV1$   
 41 of state3 (Supplementary Fig.3d-e), are shown in semi-transparent grey. Scale bar, 5 Å.  
 42

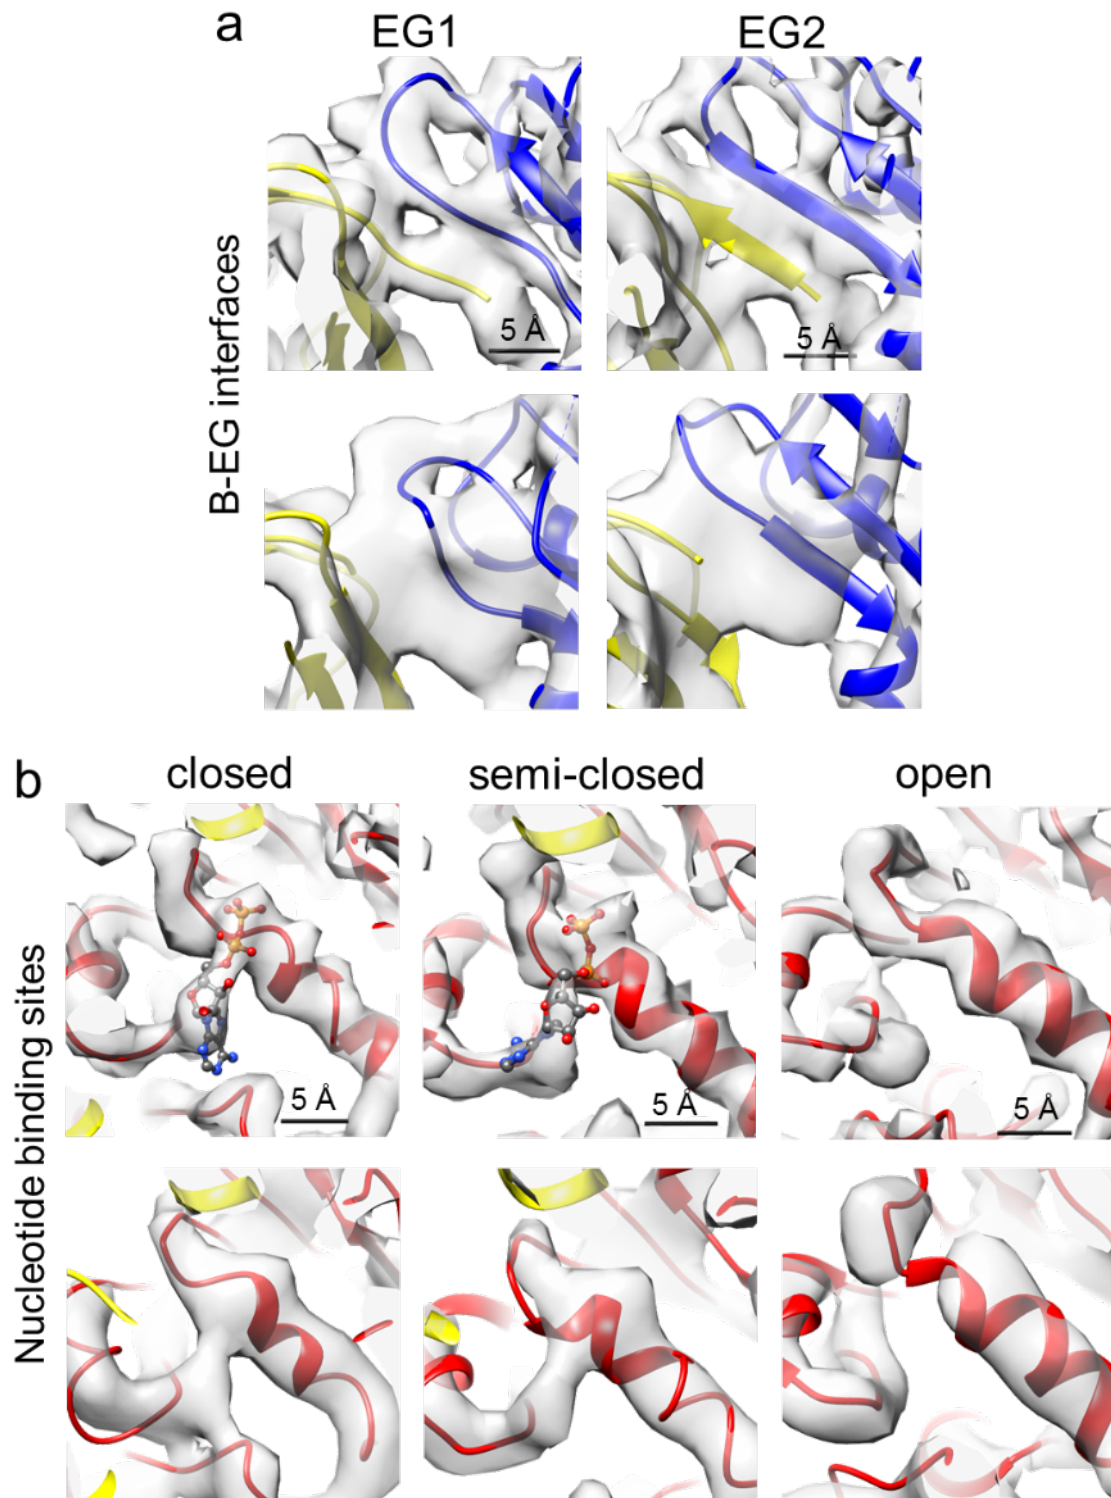

43  
 44 **Supplementary figure 6. Comparison of the EM map of state I of the V/A-ATPase produced as part**  
 45 **of this study (upper panels) with that of the previous EM map by Schep *et al.* (lower panels).**  
 46

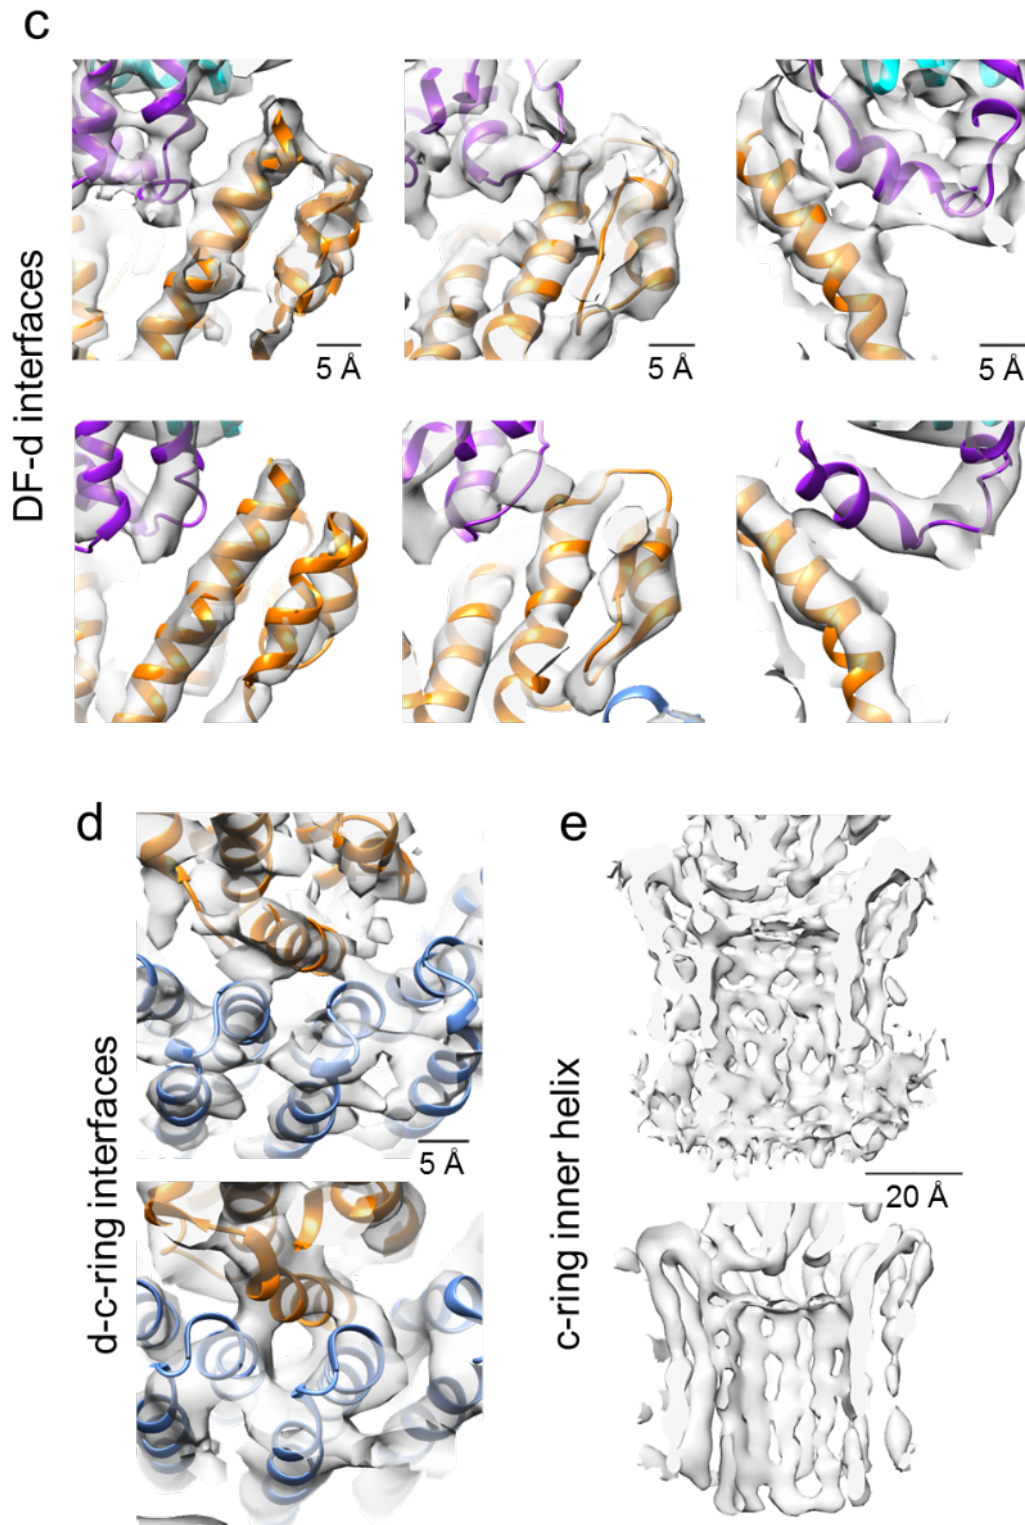

47  
 48 **Supplementary figure 6. Comparison of the EM map of state1 of the V/A-ATPase produced as part**  
 49 **of this study (upper panels) with that of the previous EM map by Schep *et al.* (lower panels).**  
 50

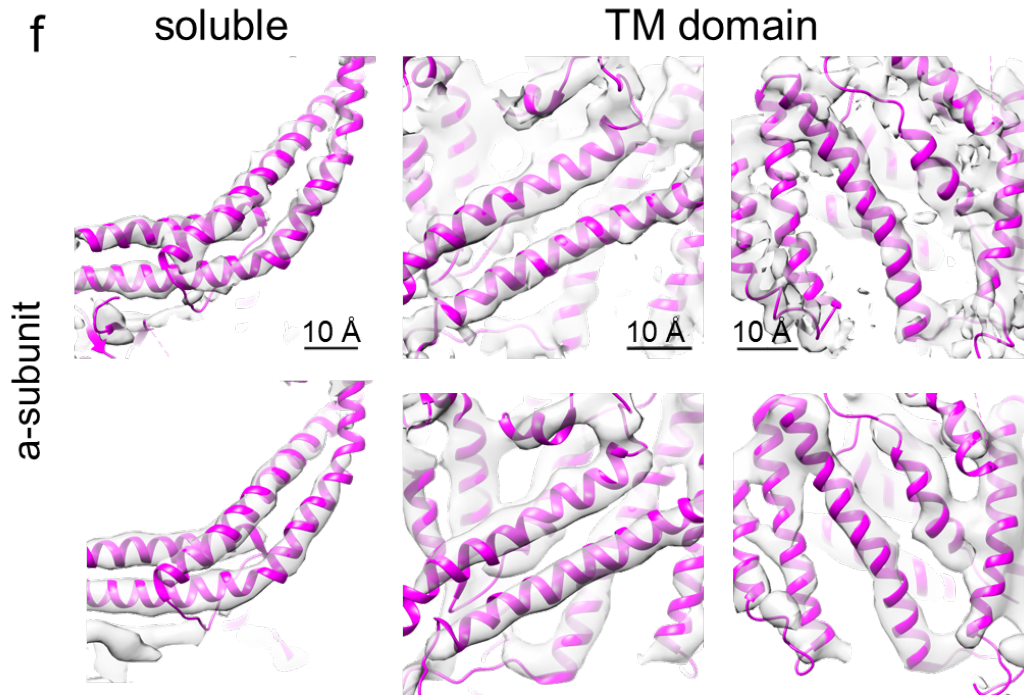

51  
 52 **Supplementary figure 6. Comparison of the EM map of state1 of the V/A-ATPase produced as part**  
 53 **of this study (upper panels) with that of the previous EM map by Schep *et al.* (lower panels).**



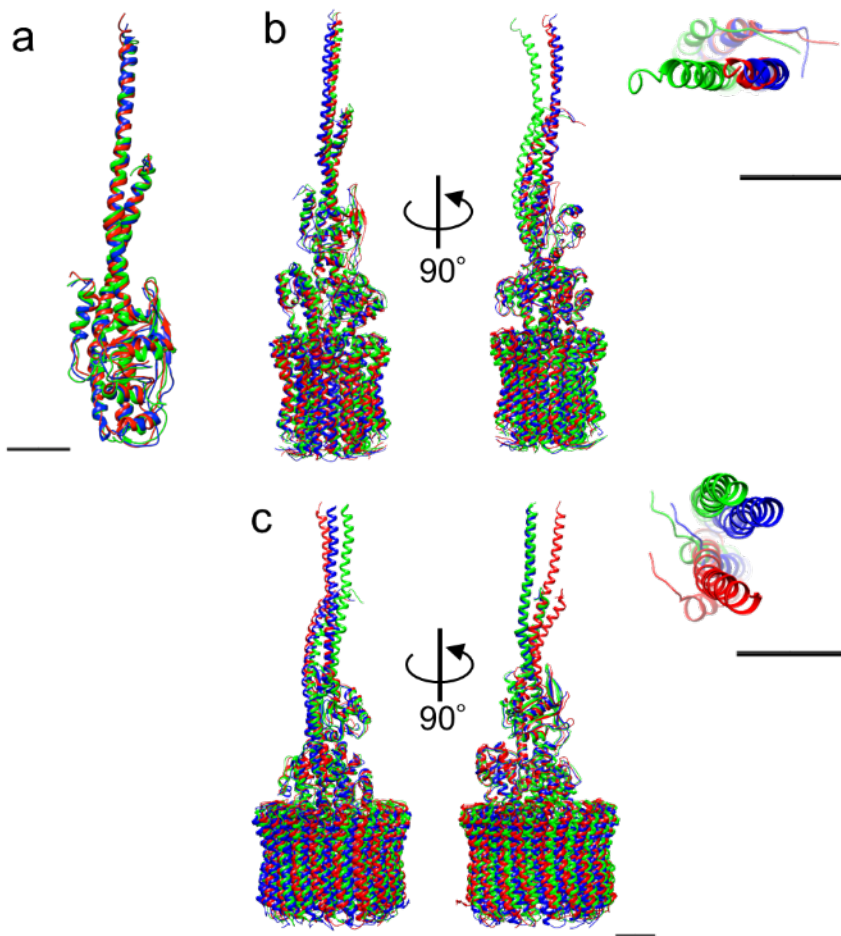

54  
 55 **Supplementary figure 7. Structural comparison of the rotor complex in state1-3.** **a**, Side views of the  
 56 models of the D and F subunits in each state when these subunits are superimposed at the D subunit.  
 57 State1, 2 and 3 are colored red, blue and green, respectively. **b**, Structural comparison of the helical region  
 58 of the rotor complex when superimposing the d subunit in state1-3 of the V/A-ATPase. **c**. Structural  
 59 comparison of the helical region of rotor complex when superimposing d subunit in state1-3 of the yeast  
 60 V-ATPase (PDBID: 3J9T, 3J9U, and 3J9V). Scale bar, 20 Å.

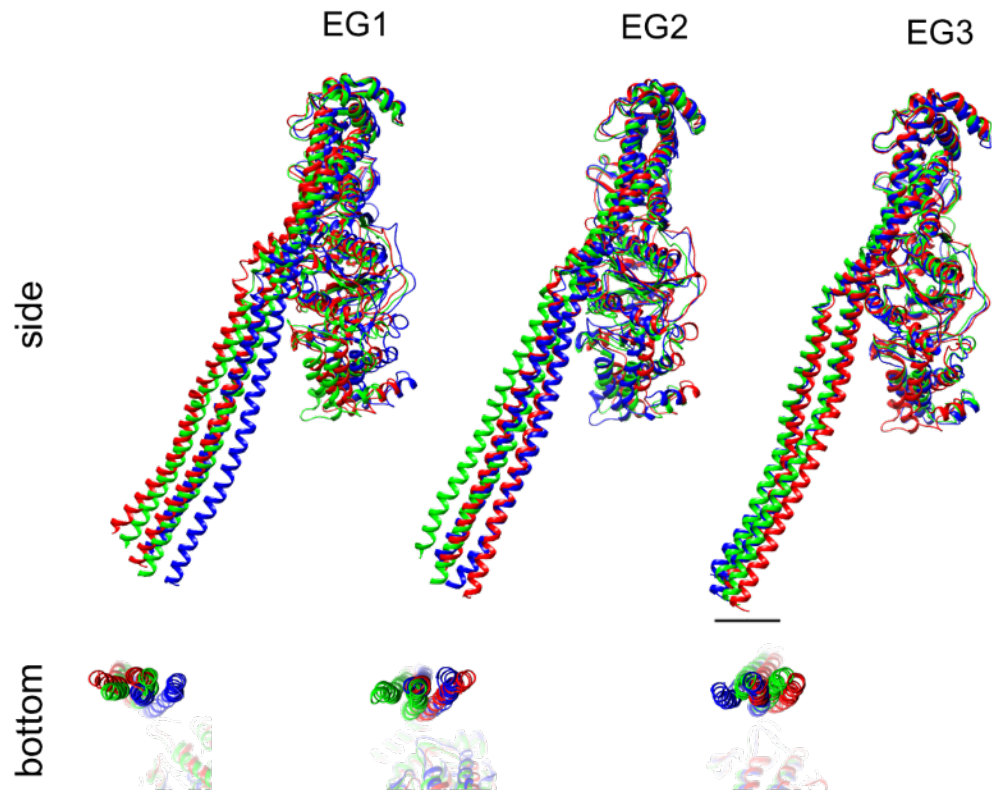

61  
 62 **Supplementary figure 8. Structural comparison of the EG stalk when superimposing  $\beta$  barrel of B**  
 63 **subunit in state1-3 of yeast V-ATPase (PDBID: 3J9T, 3J9U, and 3J9V). Scale bar, 20 Å.**

64  
 65



66

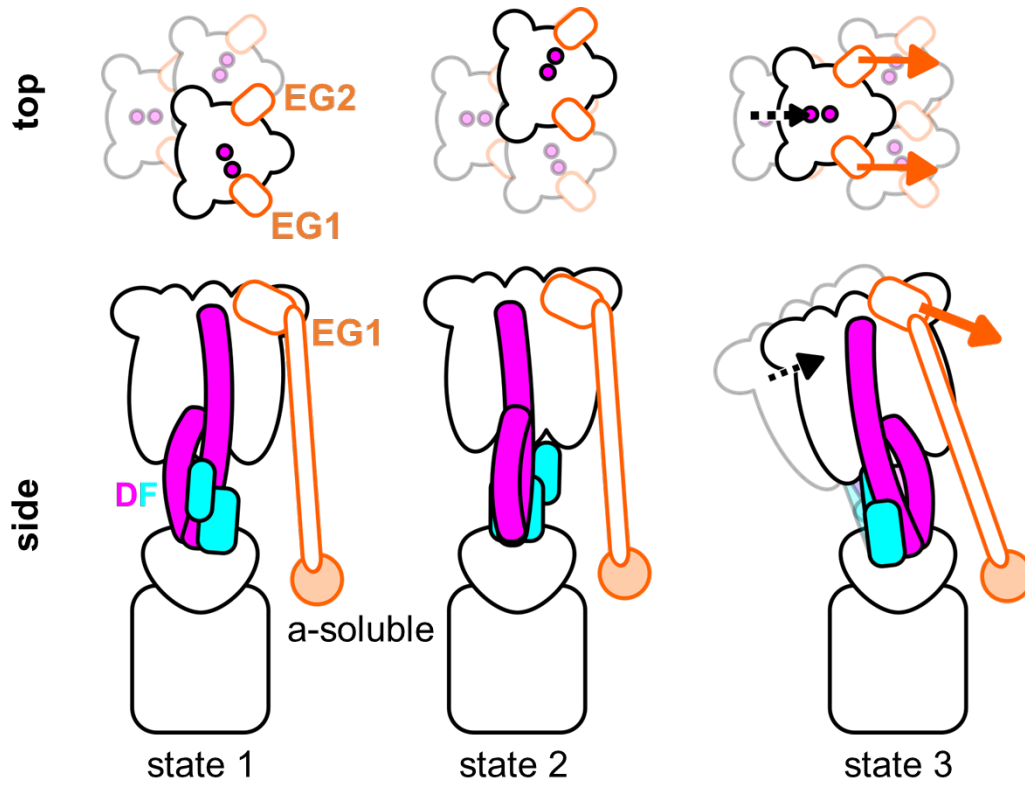

67

68 **Supplementary figure 9. Schematic model for the molecular basis of different conformation of**  
69 **state3 of the V/A-ATPase.**

70

71

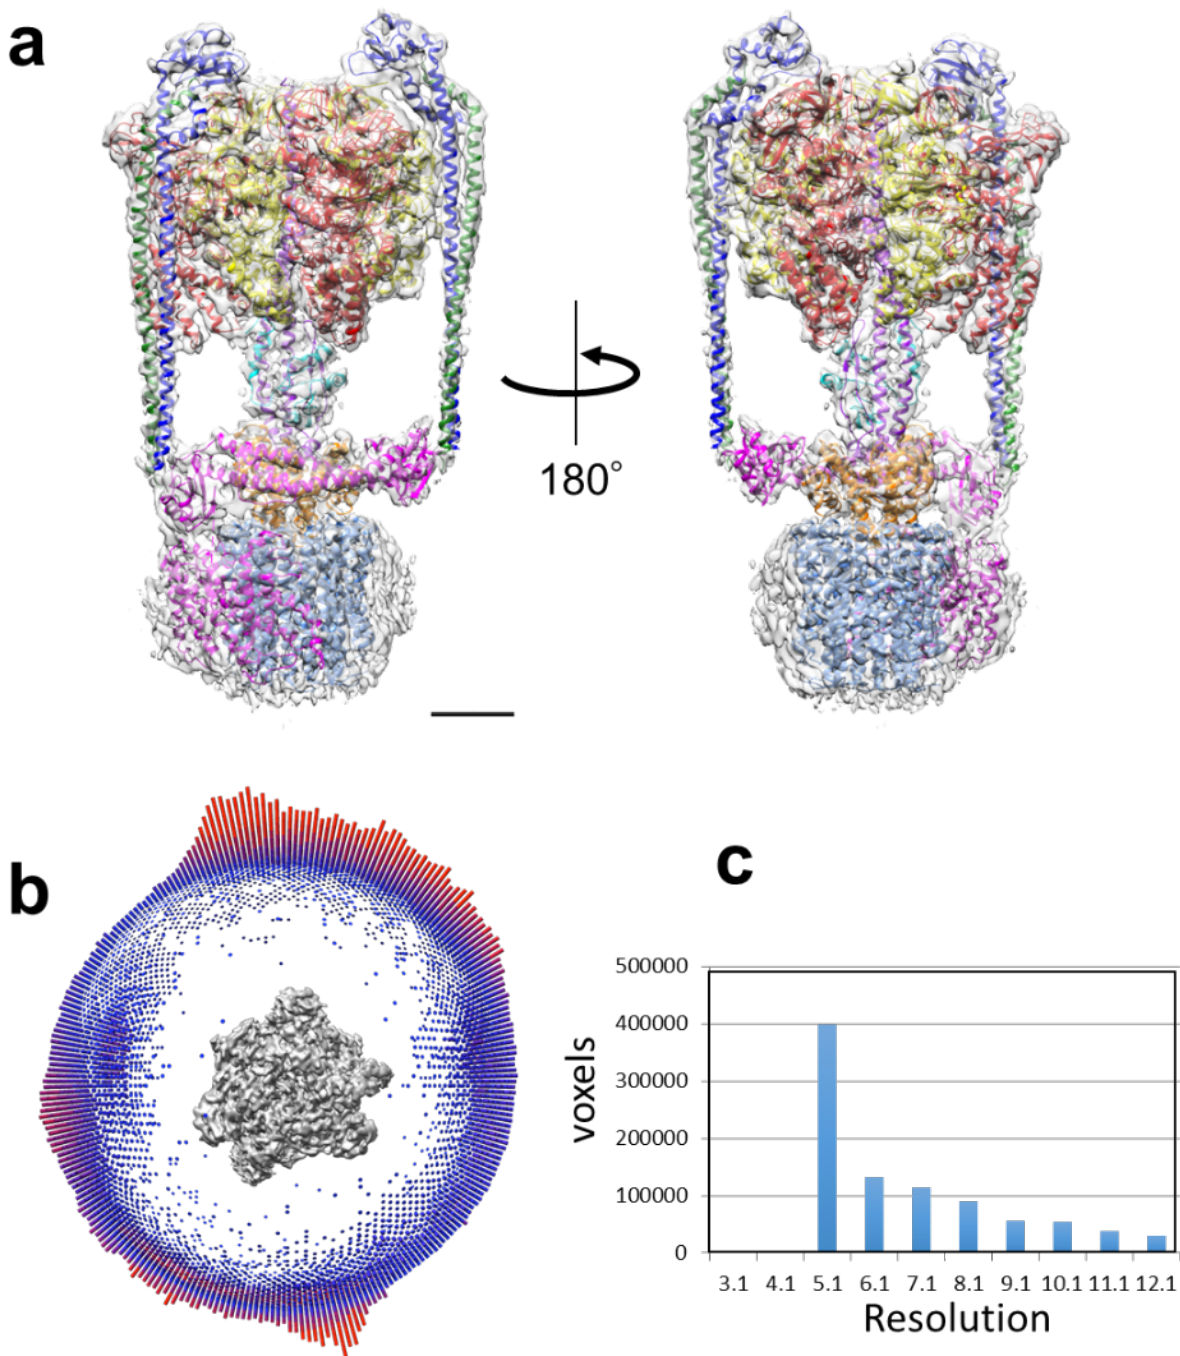

72  
 73 **Supplementary figure 10. EM map data of V/A-ATPase state1.** **a**, The refined map of state1.  
 74 Experimental maps are shown in semi-transparent grey. The atomic models of V/A-ATPase are fitted into  
 75 the maps by using MDFF. Scale bar, 30 Å. **b**, Euler angle distribution in the top view of the map. **c**,  
 76 Histogram of resolution of voxels.

77  
 78

79  
80**Supplementary table 1. Data correction for the V/A-ATPase.**

|                                                     | State 1<br>(Overall) | State 1<br>(Peripheral<br>domain) | State 2<br>(Overall) | State 2<br>(Peripheral<br>domain) | State 3<br>(Overall) | State 3<br>(Peripheral<br>domain) |
|-----------------------------------------------------|----------------------|-----------------------------------|----------------------|-----------------------------------|----------------------|-----------------------------------|
| EMDB ID                                             | EMDB-6810            | EMDB-6811                         | EMDB-6812            | -                                 | EMDB-6813            | -                                 |
| PDB ID                                              | 5Y5X                 | 5Y5Y                              | 5Y5Z                 | -                                 | 5Y60                 | -                                 |
| <b>Data collection and processing</b>               |                      |                                   |                      |                                   |                      |                                   |
| Magnification                                       |                      |                                   |                      | 59K                               |                      |                                   |
| Voltage (kV)                                        |                      |                                   |                      | 300                               |                      |                                   |
| Electron exposure (e-<br>/Å <sup>2</sup> )          |                      |                                   |                      | 26                                |                      |                                   |
| Defocus range (µm)                                  |                      |                                   |                      | 2.5-3.5                           |                      |                                   |
| Pixel size (Å)                                      |                      |                                   |                      | 1.4                               |                      |                                   |
| Symmetry imposed                                    |                      |                                   |                      | C1                                |                      |                                   |
| Micrograph collected<br>(no.)                       |                      |                                   |                      | 4.7K                              |                      |                                   |
| Final particle images<br>(no.)                      | 118K                 | 130K                              | 30.8K                | 34K                               | 13.8K                | 16K                               |
| Map resolution (Å)                                  | 5.0                  | 4.7                               | 6.7                  | 5.9                               | 7.5                  | 8.1                               |
| FSC threshold                                       |                      |                                   |                      |                                   |                      |                                   |
| <b>Refinement</b>                                   |                      |                                   |                      |                                   |                      |                                   |
| Initial model used<br>(PDB code)                    |                      |                                   |                      | 5GAR                              |                      |                                   |
| Model resolution (Å)                                | 5.06                 | 4.70                              | 6.90                 |                                   | 7.50                 |                                   |
| FSC threshold                                       |                      |                                   |                      |                                   |                      |                                   |
| Map sharpening <i>B</i><br>factor (Å <sup>2</sup> ) | -303.38              | -253.69                           | -350.79              |                                   | -347.60              |                                   |
| Model composition                                   |                      |                                   |                      |                                   |                      |                                   |
| Non-hydrogen<br>atoms                               | 44393                | 32516                             | 44394                |                                   | 44394                |                                   |
| Protein residues                                    | 5852                 | 4166                              | 5853                 |                                   | 5853                 |                                   |
| Ligands                                             | 2                    | 2                                 | 2                    |                                   | 2                    |                                   |
| R.m.s. deviations                                   |                      |                                   |                      |                                   |                      |                                   |
| Bond lengths (Å)                                    | 0.024                | 0.027                             | 0.024                |                                   | 0.024                |                                   |
| Bond angles (°)                                     | 2.65                 | 2.90                              | 2.64                 |                                   | 2.79                 |                                   |
| Validation                                          |                      |                                   |                      |                                   |                      |                                   |
| MolProbity score                                    | 2.56                 | 2.92                              | 3.29                 |                                   | 3.09                 |                                   |
| Clashscore                                          | 4.25                 | 6.83                              | 17.0                 |                                   | 10.9                 |                                   |
| Poor rotamers<br>(%)                                | 7.3                  | 9.2                               | 10.7                 |                                   | 11.4                 |                                   |
| Ramachandran plot                                   |                      |                                   |                      |                                   |                      |                                   |
| Favored (%)                                         | 82.8                 | 73.3                              | 77.0                 |                                   | 80.3                 |                                   |
| Allowed (%)                                         | 12.0                 | 17.1                              | 15.4                 |                                   | 13.2                 |                                   |
| Disallowed (%)                                      | 5.2                  | 9.6                               | 7.6                  |                                   | 6.5                  |                                   |

81  
82
